# Supplementary material for: Biological Activities Related to Plant Protection and Environmental Effects of Coumarin Derivatives: QSAR and Molecular Docking Studies
Source: MDPI journal article supplement (doi:10.3390/ijms22147283), 2021-07-06
Supplement: s1 [file s1]

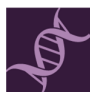

## Supplementary Materials

**Figure S1.** Dendrogram of a cluster formation for the activities against *M. phaseolina*.

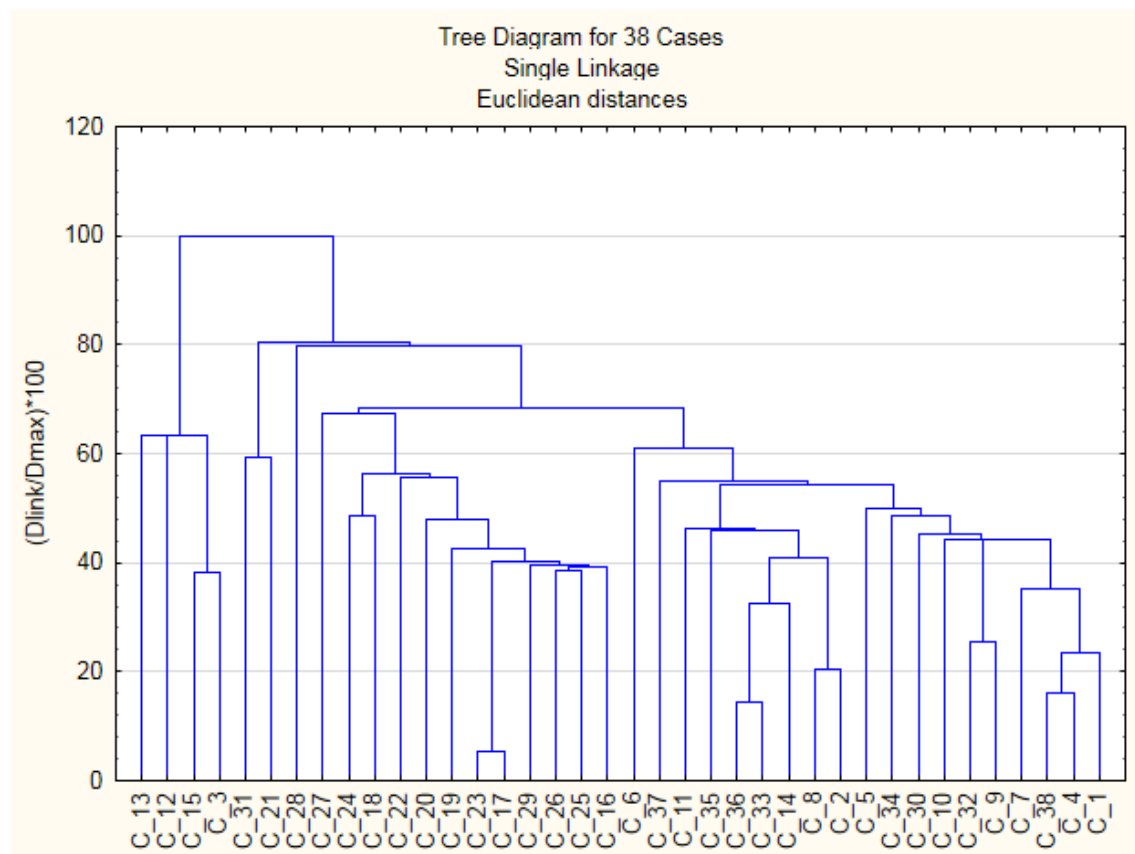

**Table S1.** Values of molecular descriptors included in model (1) and (2).

| Molecule | log % inhibition<br><i>M. phaseolina</i> | <i>JGI6</i> | <i>Mor28v</i> | <i>L2e</i> | log % inhibition<br><i>S. sclerotiorum</i> | <i>SEigm</i> | <i>P2s</i> | <i>R1e+</i> |
|----------|------------------------------------------|-------------|---------------|------------|--------------------------------------------|--------------|------------|-------------|
| 1        | 1.729                                    | 0.017       | 0.081         | 1.836      | 1.864                                      | 0.997        | 0.187      | 0.187       |
| 2        | 1.761                                    | 0.017       | 0.075         | 1.813      | 1.598                                      | 0.748        | 0.200      | 0.145       |
| 3        | 1.729                                    | 0.015       | 0.111         | 1.885      | 1.812                                      | 0.997        | 0.073      | 0.125       |
| 4        | 1.752                                    | 0.027       | 0.075         | 1.952      | 1.891                                      | 1.847        | 0.177      | 0.184       |
| 5        | 1.806                                    | 0.032       | 0.091         | 1.924      | 1.884                                      | 1.247        | 0.193      | 0.203       |
| 6        | 1.822                                    | 0.027       | 0.085         | 1.96       | 1.917                                      | 1.247        | 0.174      | 0.197       |
| 7        | 1.818                                    | 0.027       | 0.146         | 1.833      | 1.924                                      | 1.659        | 0.171      | 0.194       |
| 8        | 1.822                                    | 0.022       | 0.041         | 2.063      | 1.928                                      | 2.447        | 0.201      | 0.14        |
| 9        | 1.872                                    | 0.025       | -0.023        | 2.089      | 1.928                                      | 1.247        | 0.182      | 0.158       |
| 10       | 1.858                                    | 0.022       | -0.013        | 1.687      | 1.812                                      | 1.247        | 0.138      | 0.155       |
| 11       | 1.725                                    | 0.029       | 0.011         | 2.523      | 1.715                                      | 1.247        | 0.198      | 0.167       |
| 12       | 1.844                                    | 0.024       | 0.001         | 2.692      | 1.774                                      | 1.247        | 0.198      | 0.162       |
| 13       | 1.394                                    | 0.02        | 0.119         | 2.382      | 1.83                                       | 0.997        | 0.146      | 0.139       |
| 14       | 1.748                                    | 0.026       | 0.091         | 3.093      | 1.914                                      | 1.639        | 0.189      | 0.217       |
| 15       | 1.778                                    | 0.023       | 0.048         | 3.038      | 1.884                                      | 1.639        | 0.201      | 0.217       |
| 16       | 1.79                                     | 0.02        | 0.041         | 2.383      | 1.641                                      | 0.748        | 0.261      | 0.204       |
| 17       | 1.79                                     | 0.025       | 0.06          | 2.146      | 1.59                                       | 0.641        | 0.204      | 0.177       |
| 18       | 1.778                                    | 0.029       | 0.031         | 2.547      | 1.436                                      | 0.997        | 0.305      | 0.198       |
| 19       | 1.844                                    | 0.028       | 0.067         | 2.508      | 1.738                                      | 0.891        | 0.253      | 0.231       |
| 20       | 1.818                                    | 0.025       | 0.095         | 1.933      | 0.68                                       | 0.997        | 0.194      | 0.193       |
| 21       | 1.847                                    | 0.025       | -0.005        | 2.477      | 1.641                                      | 0.891        | 0.127      | 0.126       |
| 22       | 1.904                                    | 0.036       | 0.014         | 2.528      | 1.743                                      | 1.598        | 0.223      | 0.204       |
| 23       | 1.922                                    | 0.037       | 0.036         | 2.232      | 0                                          | 1.491        | 0.19       | 0.175       |
| 24       | 1.872                                    | 0.036       | 0.047         | 2.494      | 1.738                                      | 0.997        | 0.209      | 0.208       |
| 25       | 1.878                                    | 0.037       | 0.057         | 2.136      | 1.789                                      | 0.891        | 0.18       | 0.206       |
| 26       | 1.881                                    | 0.03        | 0.01          | 1.843      | 1.903                                      | 0.891        | 0.136      | 0.195       |
| 27       | 1.888                                    | 0.03        | 0.042         | 1.962      | 1.821                                      | 0.891        | 0.143      | 0.199       |
| 28       | 1.829                                    | 0.029       | 0.013         | 2.974      | 1.426                                      | 0.997        | 0.243      | 0.138       |
| 29       | 1.829                                    | 0.028       | 0.052         | 3.214      | 1.468                                      | 0.891        | 0.212      | 0.162       |
| 30       | 1.851                                    | 0.02        | 0.025         | 2.281      | 0                                          | 0.997        | 0.269      | 0.213       |
| 31       | 1.84                                     | 0.015       | -0.01         | 2.185      | -0.166                                     | 0.891        | 0.068      | 0.125       |
| 32       | 1.901                                    | 0.024       | 0.027         | 2.193      | 0                                          | 1.247        | 0.21       | 0.211       |
| 33       | 1.836                                    | 0.019       | 0.073         | 1.806      | 0.834                                      | 0.997        | 0.163      | 0.16        |
| 34       | 1.825                                    | 0.032       | 0.012         | 2.443      | 0                                          | 1.847        | 0.24       | 0.213       |
| 35       | 1.894                                    | 0.021       | 0.141         | 1.939      | 0                                          | 1.409        | 0.194      | 0.14        |
| 36       | 1.898                                    | 0.02        | -0.017        | 1.927      | 1.715                                      | 0.997        | 0.166      | 0.144       |
| 37       | 1.806                                    | 0.021       | 0.046         | 2.144      | 1.135                                      | 0.997        | 0.209      | 0.225       |
| 38       | 1.904                                    | 0.03        | -0.032        | 2.456      | 1.011                                      | 2.697        | 0.262      | 0.186       |

**Table S2.** Experimental determined activities against *M. phaseolina* with the activities predicted by the best obtained QSAR model (1) and residuals

| ID | Status     | Exp. endpoint | Pred. by model<br>eq. | Pred.Mod.Eq.Res. |
|----|------------|---------------|-----------------------|------------------|
| 1  | Training   | 1.729         | 1.778                 | 0.049            |
| 2  | Prediction | 1.761         | 1.783                 | 0.022            |
| 3  | Training   | 1.729         | 1.743                 | 0.014            |
| 4  | Excluded   |               |                       |                  |
| 5  | Prediction | 1.806         | 1.850                 | 0.044            |
| 6  | Training   | 1.822         | 1.825                 | 0.003            |
| 7  | Training   | 1.818         | 1.787                 | -0.031           |
| 8  | Training   | 1.822         | 1.824                 | 0.002            |
| 9  | Training   | 1.872         | 1.885                 | 0.013            |
| 10 | Prediction | 1.858         | 1.880                 | 0.022            |
| 11 | Excluded   |               |                       |                  |
| 12 | Training   | 1.844         | 1.835                 | -0.009           |
| 13 | Excluded   |               |                       |                  |
| 14 | Training   | 1.748         | 1.764                 | 0.016            |
| 15 | Prediction | 1.778         | 1.780                 | 0.002            |
| 16 | Training   | 1.790         | 1.798                 | 0.008            |
| 17 | Prediction | 1.790         | 1.823                 | 0.033            |
| 18 | Excluded   |               |                       |                  |
| 19 | Training   | 1.844         | 1.818                 | -0.026           |
| 20 | Training   | 1.818         | 1.808                 | -0.010           |
| 21 | Training   | 1.847         | 1.855                 | 0.008            |
| 22 | Prediction | 1.904         | 1.900                 | -0.004           |
| 23 | Training   | 1.922         | 1.903                 | -0.019           |
| 24 | Training   | 1.872         | 1.878                 | 0.006            |
| 25 | Training   | 1.878         | 1.892                 | 0.014            |
| 26 | Prediction | 1.881         | 1.900                 | 0.019            |
| 27 | Training   | 1.888         | 1.872                 | -0.016           |
| 28 | Training   | 1.829         | 1.841                 | 0.012            |
| 29 | Training   | 1.829         | 1.797                 | -0.032           |
| 30 | Prediction | 1.851         | 1.814                 | -0.037           |
| 31 | Training   | 1.840         | 1.816                 | -0.024           |
| 32 | Excluded   |               |                       |                  |
| 33 | Prediction | 1.836         | 1.796                 | -0.040           |
| 34 | Training   | 1.825         | 1.883                 | 0.058            |
| 35 | Excluded   |               |                       |                  |
| 36 | Training   | 1.898         | 1.860                 | -0.038           |
| 37 | Training   | 1.806         | 1.811                 | 0.005            |
| 38 | Training   | 1.904         | 1.903                 | -0.001           |

**Figure S2.** Dendrogram of a cluster formation for the activities against *S. sclerotiorum*.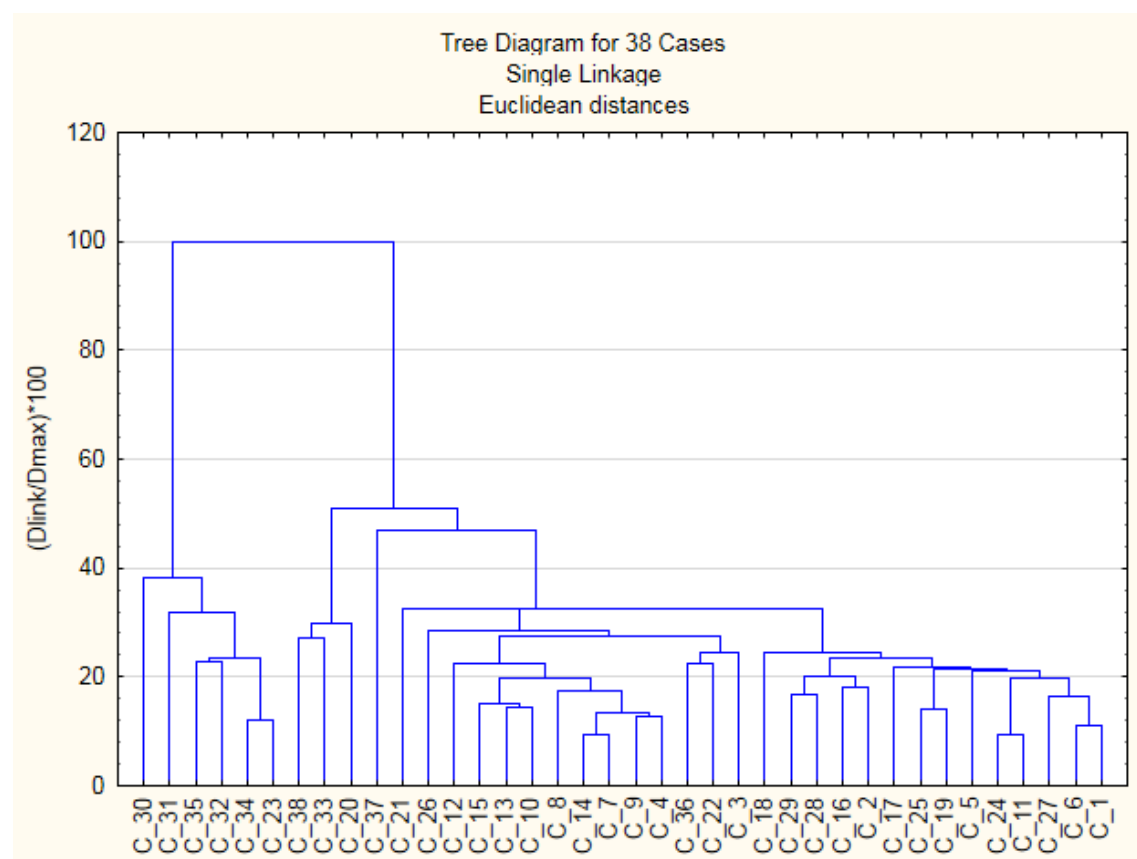

**Table S3.** Experimental determined activities against *S. sclerotiorum* with the activities predicted by the best obtained QSAR models and residuals

| ID | Status   | Exp. endpoint | Pred. by model eq. | Pred.Mod.Eq.Res. |
|----|----------|---------------|--------------------|------------------|
| 1  | Training | 1.864         | 1.756              | -0.108           |
| 2  | Training | 1.598         | 1.567              | -0.031           |
| 3  | Training | 1.812         | 1.872              | 0.060            |
| 4  | Training | 1.891         | 1.938              | 0.047            |
| 5  | Training | 1.884         | 1.832              | -0.052           |
| 6  | Training | 1.917         | 1.862              | -0.055           |
| 7  | Training | 1.924         | 1.942              | 0.018            |
| 8  | Training | 1.928         | 1.882              | -0.047           |
| 9  | Training | 1.928         | 1.742              | -0.187           |
| 10 | Training | 1.812         | 1.841              | 0.029            |
| 11 | Training | 1.715         | 1.726              | 0.011            |
| 12 | Training | 1.774         | 1.713              | -0.061           |
| 13 | Training | 1.830         | 1.731              | -0.099           |
| 14 | Training | 1.914         | 1.954              | 0.040            |
| 15 | Training | 1.884         | 1.925              | 0.041            |
| 16 | Training | 1.641         | 1.572              | -0.069           |
| 17 | Training | 1.590         | 1.620              | 0.030            |
| 18 | Training | 1.436         | 1.498              | 0.062            |
| 19 | Training | 1.738         | 1.690              | -0.049           |
| 20 | Excluded |               |                    |                  |
| 21 | Training | 1.641         | 1.723              | 0.082            |
| 22 | Training | 1.743         | 1.830              | 0.087            |
| 23 | Excluded |               |                    |                  |
| 24 | Training | 1.738         | 1.757              | 0.019            |
| 25 | Training | 1.789         | 1.802              | 0.013            |
| 26 | Training | 1.903         | 1.880              | -0.023           |
| 27 | Training | 1.821         | 1.874              | 0.053            |
| 28 | Training | 1.426         | 1.493              | 0.067            |
| 29 | Training | 1.468         | 1.610              | 0.142            |
| 30 | Excluded |               |                    |                  |
| 31 | Excluded |               |                    |                  |
| 32 | Excluded |               |                    |                  |
| 33 | Excluded |               |                    |                  |
| 34 | Excluded |               |                    |                  |
| 35 | Excluded |               |                    |                  |
| 36 | Training | 1.715         | 1.696              | -0.020           |
| 37 | Excluded |               |                    |                  |
| 38 | Excluded |               |                    |                  |
